# Supplementary material
Source: PubMed Central journal article supplement (PMC8453415)
Supplement: deaa232_supplementary_data_ts1.pdf [file deaa232_supplementary_data_ts1.pdf]

**Supplementary Table S1** Baseline characteristics of, and comparisons between, predictor variables for live birth.

| Variables                              | Live birth (n = 398) | No live birth (n = 1252) | P-value |
|----------------------------------------|----------------------|--------------------------|---------|
| Race                                   |                      |                          | 0.621   |
| White                                  | 327/398 (82.16)      | 985/1252 (78.67)         |         |
| Black or African American              | 35/398 (8.79)        | 149/1252 (11.90)         |         |
| Asian                                  | 20/398 (5.03)        | 63/1252 (5.03)           |         |
| American Indian or Alaska Native       | 4/398 (1.01)         | 13/1252 (1.04)           |         |
| Native Hawaiian or Pacific Islander    | 0/398 (0.00)         | 2/1252 (0.16)            |         |
| Mixed race                             | 12/398 (3.02)        | 40/1252 (3.19)           |         |
| Ethnic group                           |                      |                          | 0.312   |
| Not Hispanic or Latino                 | 351/398 (88.19)      | 1077/1252 (86.02)        |         |
| Hispanic or Latino                     | 47/398 (11.81)       | 175/1252 (13.98)         |         |
| Age, years (total n)                   | 30.04 ± 4.33 (398)   | 30.88 ± 4.62 (1252)      | 0.001   |
| BMI, kg/m <sup>2</sup> (total n)       | 29.28 ± 8.10 (398)   | 31.10 ± 9.08 (1252)      | <0.001  |
| Prior parity                           | 90/398 (22.61)       | 249/1252 (19.89)         | 0.133   |
| Insurance coverage                     |                      |                          | 0.214   |
| Managed Care Plan or HMO               | 266/398 (66.83)      | 774/1252 (61.82)         |         |
| Other Private Insurance                | 74/398 (18.59)       | 229/1252 (18.29)         |         |
| Medicaid                               | 9/398 (2.26)         | 40/1252 (3.19)           |         |
| Medicare                               | 2/398 (0.50)         | 8/1252 (0.64)            |         |
| Self-pay/uninsured                     | 47/398 (11.81)       | 201/1252 (16.05)         |         |
| Education                              |                      |                          | 0.080   |
| High school graduate or less           | 46/398 (11.56)       | 200/1252 (15.97)         |         |
| College graduate or some college       | 267/398 (67.09)      | 813/1252 (64.94)         |         |
| Graduate degree                        | 85/398 (21.36)       | 239/1252 (19.09)         |         |
| Income                                 |                      |                          | 0.032   |
| <\$50 000                              | 93/335 (27.76)       | 359/1050 (34.19)         |         |
| ≥\$50 000                              | 242/335 (72.24)      | 691/1050 (65.81)         |         |
| History of smoking                     |                      |                          | 0.014   |
| Never smoked                           | 244/398 (61.31)      | 782/1252 (62.46)         |         |
| Current smoking                        | 31/398 (7.79)        | 151/1252 (12.06)         |         |
| Quit smoking                           | 123/398 (30.90)      | 319/1252 (25.48)         |         |
| Duration of infertility                |                      |                          | <0.001  |
| <2 years                               | 186/391 (47.57)      | 402/1215 (33.09)         |         |
| 2–4 years                              | 142/391 (36.32)      | 516/1215 (42.47)         |         |
| >4 years                               | 63/391 (16.11)       | 297/1215 (24.44)         |         |
| History of prior infertility treatment | 204/398 (51.26)      | 711/1252 (56.79)         | 0.056   |
| Total FertiQoL score                   | 74.67 ± 14.00 (395)  | 74.97 ± 13.97 (1203)     | 0.710   |
| PRIME-MD                               |                      |                          | 0.274   |
| Major depressive syndrome              | 4/22 (18.18)         | 18/70 (25.71)            |         |
| Other depressive syndrome              | 10/22 (45.45)        | 36/70 (51.43)            |         |
| Panic syndrome                         | 3/22 (13.64)         | 11/70 (15.71)            |         |
| Other anxiety syndrome                 | 5/22 (22.73)         | 5/70 (7.14)              |         |
| Psychiatric syndrome                   | 27/394 (6.85)        | 84/1198 (7.01)           | 1.000   |
| Prior pregnancy loss                   | 119/398 (29.90)      | 329/1252 (26.28)         | 0.174   |
| Adherence to protocols                 |                      |                          | <0.001  |
| Yes                                    | 360/398 (90.45)      | 828/1252 (66.13)         |         |
| No                                     | 38/398 (9.55)        | 424/1252 (33.87)         |         |

FertiQoL, total fertility-related quality of life; PRIME-MD, Primary Care Evaluation of Mental Disorders.

Student's *t*-test and  $\chi^2$  or Fisher's exact tests were performed for continuous or categorical variables, respectively.

Data are presented as mean ± SD, unless otherwise stated.

Values in parentheses represent percentages unless otherwise stated.
