# Supplementary material
Source: PubMed Central journal article supplement (PMC8453415)
Supplement: deaa232_supplementary_data_ts2.pdf [file deaa232_supplementary_data_ts2.pdf]

**Supplementary Table SII Predictive variables and participants who had live birth—with interaction variables added into the model.**

| Variables                                                             | Live birth<br>P-value |
|-----------------------------------------------------------------------|-----------------------|
| Race                                                                  | 0.924                 |
| Not adherent to study protocol                                        | 0.035                 |
| Race*not adherent to study protocol                                   | 0.685                 |
| Ethnicity                                                             | 0.856                 |
| Ethnicity*not adherent to study protocol                              | 0.568                 |
| Age                                                                   | <0.001                |
| Age*not adherent to study protocol                                    | 0.603                 |
| BMI                                                                   | 0.632                 |
| BMI*not adherent to study protocol                                    | 0.145                 |
| Income                                                                | 0.213                 |
| Income*not adherent to study protocol                                 | 0.387                 |
| Insurance coverage                                                    | 0.826                 |
| Insurance coverage*not adherent to study protocol                     | 0.239                 |
| History of smoking                                                    | 0.406                 |
| History of smoking*not adherent to study protocol                     | 0.131                 |
| Duration of infertility                                               | 0.002                 |
| Duration of infertility*not adherent to study protocol                | 0.726                 |
| History of prior infertility treatment                                | 0.570                 |
| History of prior infertility treatment*not adherent to study protocol | 0.760                 |
| Prior pregnancy loss                                                  | 0.002                 |
| Prior pregnancy loss*not adherent to study protocol                   | 0.639                 |
| Treatment                                                             | 0.006                 |
| Treatment*not adherent to study protocol                              | 0.491                 |

\*Represents interaction between predictive variable and adherence to study protocol.
