# Supplementary material
Source: PubMed Central journal article supplement (PMC8453415)
Supplement: deaa232_supplementary_data_ts3.pdf [file deaa232_supplementary_data_ts3.pdf]

**Supplementary Table SIII** Baseline characteristics of, and comparisons between, predictor variables for participation in ancillary sub-studies.

**Participation in blood sampling for DNA.**

| Variables                              | Agreed to study DNA collection (n = 1350) | Did not agree to study DNA collection (n = 215) | P-value |
|----------------------------------------|-------------------------------------------|-------------------------------------------------|---------|
| Race                                   |                                           |                                                 | <0.001  |
| White                                  | 1113/1350 (82.44)                         | 138/215 (64.19)                                 |         |
| Black or African American              | 127/1350 (9.41)                           | 42/215 (19.53)                                  |         |
| Asian                                  | 53/1350 (3.93)                            | 25/215 (11.63)                                  |         |
| American Indian or Alaska Native       | 13/1350 (0.96)                            | 3/215 (1.40)                                    |         |
| Native Hawaiian or Pacific Islander    | 1/1350 (0.07)                             | 1/215 (0.47)                                    |         |
| Mixed race                             | 43/1350 (3.19)                            | 6/215 (2.79)                                    |         |
| Ethnic group                           |                                           |                                                 | 0.004   |
| Not Hispanic or Latino                 | 1152/1350 (85.33)                         | 199/215 (92.56)                                 |         |
| Hispanic or Latino                     | 198/1350 (14.67)                          | 16/215 (7.44)                                   |         |
| Age, years (total n)                   | 30.76 ± 4.57 (1350)                       | 31.01 ± 4.42 (215)                              | 0.453   |
| BMI, kg/m <sup>2</sup> (total n)       | 30.79 ± 8.90 (1350)                       | 27.42 ± 7.34 (215)                              | <0.001  |
| Prior parity                           | 271/1350 (20.07)                          | 51/215 (23.72)                                  | 0.004   |
| Insurance coverage                     |                                           |                                                 | 0.008   |
| Managed Care Plan or HMO               | 861/1350 (63.78)                          | 123/215 (57.21)                                 |         |
| Other Private Insurance                | 230/1350 (17.04)                          | 58/215 (26.98)                                  |         |
| Medicaid                               | 37/1350 (2.74)                            | 8/215 (3.72)                                    |         |
| Medicare                               | 9/1350 (0.67)                             | 1/215 (0.47)                                    |         |
| Self-pay/uninsured                     | 213/1350 (15.78)                          | 25/215 (11.63)                                  |         |
| Education                              |                                           |                                                 | 0.615   |
| High school graduate or less           | 197/1350 (14.59)                          | 29/215 (13.49)                                  |         |
| College graduate or some college       | 890/1350 (65.93)                          | 138/215 (64.19)                                 |         |
| Graduate degree                        | 263/1350 (19.48)                          | 48/215 (22.33)                                  |         |
| Income                                 |                                           |                                                 | 0.784   |
| <US\$50 000                            | 365/1153 (31.66)                          | 51/156 (32.69)                                  |         |
| ≥US\$50 000                            | 788/1153 (68.34)                          | 105/156 (67.31)                                 |         |
| History of smoking                     |                                           |                                                 | 0.022   |
| Never smoked                           | 821/1350 (60.81)                          | 152/215 (70.70)                                 |         |
| Current smoking                        | 154/1350 (11.41)                          | 18/215 (8.37)                                   |         |
| Quit smoking                           | 375/1350 (27.78)                          | 45/215 (20.93)                                  |         |
| Duration of infertility                |                                           |                                                 | 0.595   |
| <2 years                               | 472/1311 (36.00)                          | 83/213 (38.97)                                  |         |
| 2–4 years                              | 538/1311 (41.04)                          | 87/213 (40.85)                                  |         |
| >4 years                               | 301/1311 (22.96)                          | 43/213 (20.19)                                  |         |
| History of prior infertility treatment | 753/1350 (55.78)                          | 111/215 (51.63)                                 | 0.269   |
| Total FertiQol score                   | 74.96 ± 13.99 (1316)                      | 76.10 ± 13.45 (199)                             | 0.282   |
| PRIME-MD                               |                                           |                                                 | 0.816   |
| Major depressive syndrome              | 18/72 (25.00)                             | 2/9 (22.22)                                     |         |
| Other depressive syndrome              | 37/72 (51.39)                             | 5/9 (55.56)                                     |         |
| Panic syndrome                         | 10/72 (13.89)                             | 2/9 (22.22)                                     |         |

(continued)

**Supplementary Table SIII Continued**
**Participation in blood sampling for DNA.**

| Variables                     | Agreed to study DNA collection (n = 1350) | Did not agree to study DNA collection (n = 215) | P-value |
|-------------------------------|-------------------------------------------|-------------------------------------------------|---------|
| Other anxiety syndrome        | 7/72 (9.72)                               | 0/9 (0.00)                                      | 0.280   |
| PRIME-MD psychiatric syndrome | 88/1311 (6.71)                            | 9/198 (4.55)                                    |         |
| Adherence to study            |                                           |                                                 | 0.869   |
| Yes                           | 982/1350 (72.74)                          | 155/215 (72.09)                                 |         |
| No                            | 368/1350 (27.26)                          | 60/215 (27.91)                                  |         |

**Participation in blood repository collection or blood storage for future use.**

| Variables                              | Agreed to take part in blood repository collection or blood storage for future use (n = 1433) | Did not agree to take part in blood repository collection or blood storage for future use (n = 217) | P-value |
|----------------------------------------|-----------------------------------------------------------------------------------------------|-----------------------------------------------------------------------------------------------------|---------|
| Race                                   |                                                                                               |                                                                                                     | <0.001  |
| White                                  | 1169/1433 (81.58)                                                                             | 143/217 (65.90)                                                                                     |         |
| Black or African American              | 138/1433 (9.63)                                                                               | 46/217 (21.20)                                                                                      |         |
| Asian                                  | 66/1433 (4.61)                                                                                | 17/217 (7.83)                                                                                       |         |
| American Indian or Alaska Native       | 15/1433 (1.05)                                                                                | 2/217 (0.92)                                                                                        |         |
| Native Hawaiian or Pacific Islander    | 1/1433 (0.07)                                                                                 | 1/217 (0.46)                                                                                        |         |
| Mixed race                             | 44/1433 (3.07)                                                                                | 8/217 (3.69)                                                                                        |         |
| Ethnic group                           |                                                                                               |                                                                                                     | 0.054   |
| Not Hispanic or Latino                 | 1231/1433 (85.90)                                                                             | 197/217 (90.78)                                                                                     |         |
| Hispanic or Latino                     | 202/1433 (14.10)                                                                              | 20/217 (9.22)                                                                                       |         |
| Age, years (total n)                   | 30.77 ± 4.58 (1433)                                                                           | 30.08 ± 4.44 (217)                                                                                  | 0.039   |
| BMI, (kg/m <sup>2</sup> ) (total n)    | 30.61 ± 8.86 (1433)                                                                           | 31.03 ± 9.06 (217)                                                                                  | 0.518   |
| Prior parity                           | 290/1433 (20.24)                                                                              | 49/217 (22.58)                                                                                      | 0.054   |
| Insurance coverage                     |                                                                                               |                                                                                                     | 0.032   |
| Managed Care Plan or HMO               | 909/1433 (63.43)                                                                              | 131/217 (60.37)                                                                                     |         |
| Other Private Insurance                | 251/1433 (17.52)                                                                              | 52/217 (23.96)                                                                                      |         |
| Medicaid                               | 39/1433 (2.72)                                                                                | 10/217 (4.61)                                                                                       |         |
| Medicare                               | 10/1433 (0.70)                                                                                | 0/217 (0.00)                                                                                        |         |
| Self-pay/uninsured                     | 224/1433 (15.63)                                                                              | 24/217 (11.06)                                                                                      |         |
| Education                              |                                                                                               |                                                                                                     | 0.351   |
| High school graduate or less           | 209/1433 (14.58)                                                                              | 37/217 (17.05)                                                                                      |         |
| College graduate or some college       | 947/1433 (66.09)                                                                              | 133/217 (61.29)                                                                                     |         |
| Graduate degree                        | 277/1433 (19.33)                                                                              | 47/217 (21.66)                                                                                      |         |
| Income                                 |                                                                                               |                                                                                                     | 0.014   |
| <US\$50 000                            | 383/1217 (31.47)                                                                              | 69/168 (41.07)                                                                                      |         |
| ≥US\$50 000                            | 834/1217 (68.53)                                                                              | 99/168 (58.93)                                                                                      |         |
| History of smoking                     |                                                                                               |                                                                                                     | 0.508   |
| Never smoked                           | 885/1433 (61.76)                                                                              | 141/217 (64.98)                                                                                     |         |
| Current smoking                        | 157/1433 (10.96)                                                                              | 25/217 (11.52)                                                                                      |         |
| Quit smoking                           | 391/1433 (27.29)                                                                              | 51/217 (23.50)                                                                                      |         |
| Duration of infertility                |                                                                                               |                                                                                                     | 0.671   |
| <2 years                               | 510/1393 (36.61)                                                                              | 78/213 (36.62)                                                                                      |         |
| 2–4 years                              | 566/1393 (40.63)                                                                              | 92/213 (43.19)                                                                                      |         |
| >4 years                               | 317/1393 (22.76)                                                                              | 43/213 (20.19)                                                                                      |         |
| History of prior infertility treatment | 794/1433 (55.41)                                                                              | 121/217 (55.76)                                                                                     | 0.942   |

(continued)

**Supplementary Table SIII Continued**

**Participation in blood repository collection or blood storage for future use.**

| <b>Variables</b>              | <b>Agreed to take part in blood repository collection or blood storage for future use (n = 1433)</b> | <b>Did not agreed to take part in blood repository collection or blood storage for future use (n = 217)</b> | <b>P-value</b> |
|-------------------------------|------------------------------------------------------------------------------------------------------|-------------------------------------------------------------------------------------------------------------|----------------|
| Total FertiQoL score          | 75.00 ± 13.98 (1393)                                                                                 | 74.22 ± 13.96 (205)                                                                                         | 0.458          |
| PRIME-MD                      |                                                                                                      |                                                                                                             | 0.939          |
| Major depressive syndrome     | 19/79 (24.05)                                                                                        | 3/13 (23.08)                                                                                                |                |
| Other depressive syndrome     | 40/79 (50.63)                                                                                        | 6/13 (46.15)                                                                                                |                |
| Panic syndrome                | 12/79 (15.19)                                                                                        | 2/13 (15.38)                                                                                                |                |
| Other anxiety syndrome        | 8/79 (10.13)                                                                                         | 2/13 (15.38)                                                                                                |                |
| PRIME-MD psychiatric syndrome | 95/1388 (6.84)                                                                                       | 16/204 (7.84)                                                                                               | 0.558          |
| Adherence to study            |                                                                                                      |                                                                                                             | 0.074          |
| Yes                           | 1043/1433 (72.78)                                                                                    | 145/217 (66.82)                                                                                             |                |
| No                            | 390/1433 (27.22)                                                                                     | 72/217 (33.18)                                                                                              |                |

**Participation in pregnancy registry.**

| <b>Variables</b>                    | <b>Agreed to take part in pregnancy registry (n = 277)</b> | <b>Did not agreed to take part in pregnancy registry (n = 312)</b> | <b>P-value</b> |
|-------------------------------------|------------------------------------------------------------|--------------------------------------------------------------------|----------------|
| Race                                |                                                            |                                                                    | 0.078          |
| White                               | 237/277 (85.56)                                            | 241/312 (77.24)                                                    |                |
| Black or African American           | 21/277 (7.58)                                              | 37/312 (11.86)                                                     |                |
| Asian                               | 9/277 (3.25)                                               | 22/312 (7.05)                                                      |                |
| American Indian or Alaska Native    | 2/277 (0.72)                                               | 3/312 (0.96)                                                       |                |
| Native Hawaiian or Pacific Islander | 0/277 (0.00)                                               | 0/312 (0.00)                                                       |                |
| Mixed race                          | 8/277 (2.89)                                               | 9/312 (2.88)                                                       |                |
| Ethnic group                        |                                                            |                                                                    | 1.000          |
| Not Hispanic or Latino              | 245/277 (88.45)                                            | 276/312 (88.46)                                                    |                |
| Hispanic or Latino                  | 32/277 (11.55)                                             | 36/312 (11.54)                                                     |                |
| Age; year (total n)                 | 29.93 ± 4.38 (277)                                         | 30.84 ± 4.38 (312)                                                 | 0.013          |
| BMI kg/m <sup>2</sup> (total n)     | 29.87 ± 8.70 (277)                                         | 29.29 ± 7.64 (312)                                                 | 0.387          |
| Prior parity                        | 59/277 (21.30)                                             | 81/312 (25.96)                                                     | 1.000          |
| Insurance coverage                  |                                                            |                                                                    | 0.817          |
| Managed Care Plan or HMO            | 178/277 (64.26)                                            | 200/312 (64.10)                                                    |                |
| Other Private Insurance             | 60/277 (21.66)                                             | 62/312 (19.87)                                                     |                |
| Medicaid                            | 7/277 (2.53)                                               | 6/312 (1.92)                                                       |                |
| Medicare                            | 1/277 (0.36)                                               | 3/312 (0.96)                                                       |                |
| Self-pay/uninsured                  | 31/277 (11.19)                                             | 41/312 (13.14)                                                     |                |
| Education                           |                                                            |                                                                    | 0.276          |
| High school graduate or less        | 27/277 (9.75)                                              | 43/312 (13.78)                                                     |                |
| College graduate or some college    | 188/277 (67.87)                                            | 208/312 (66.67)                                                    |                |
| Graduate degree                     | 62/277 (22.38)                                             | 61/312 (19.55)                                                     |                |
| Income                              |                                                            |                                                                    | 0.369          |
| <US\$50 000                         | 62/241 (25.73)                                             | 77/260 (29.62)                                                     |                |
| ≥US\$50 000                         | 179/241 (74.27)                                            | 183/260 (70.38)                                                    |                |
| History of smoking                  |                                                            |                                                                    | 0.439          |
| Never smoked                        | 177/277 (63.90)                                            | 198/312 (63.46)                                                    |                |
| Current smoking                     | 19/277 (6.86)                                              | 30/312 (9.62)                                                      |                |
| Quit smoking                        | 81/277 (29.24)                                             | 84/312 (26.92)                                                     |                |
| Duration of infertility             |                                                            |                                                                    | 0.004          |

(continued)

### Supplementary Table SIII Continued

#### Participation in pregnancy registry.

| Variables                              | Agreed to take part in pregnancy registry (n = 277) | Did not agreed to take part in pregnancy registry (n = 312) | P-value |
|----------------------------------------|-----------------------------------------------------|-------------------------------------------------------------|---------|
| <2 years                               | 138/274 (50.36)                                     | 116/301 (38.54)                                             |         |
| 2–4 years                              | 89/274 (32.48)                                      | 138/301 (45.85)                                             |         |
| >4 years                               | 47/274 (17.15)                                      | 47/301 (15.61)                                              |         |
| History of prior infertility treatment | 135/277 (48.74)                                     | 140/312 (44.87)                                             | 0.137   |
| Total FertiQol score                   | 75.34 ± 13.70 (274)                                 | 74.84 ± 13.74 (305)                                         | 0.668   |
| PRIME-MD                               |                                                     |                                                             | 0.705   |
| Major depressive syndrome              | 3/15 (20.00)                                        | 6/21 (28.57)                                                |         |
| Other depressive syndrome              | 7/15 (46.67)                                        | 9/21 (42.86)                                                |         |
| Panic syndrome                         | 1/15 (6.67)                                         | 3/21 (14.29)                                                |         |
| Other anxiety syndrome                 | 4/15 (26.67)                                        | 3/21 (14.29)                                                |         |
| PRIME-MD psychiatric syndrome          | 16/274 (5.84)                                       | 27/303 (8.91)                                               | 0.204   |
| Adherence to study                     |                                                     |                                                             | 1.000   |
| Yes                                    | 254/277 (91.70)                                     | 287/312 (91.99)                                             |         |
| No                                     | 23/277 (8.30)                                       | 25/312 (8.01)                                               |         |

Student's *t*-test and  $\chi^2$  or Fisher's exact tests were performed for continuous or categorical variables, respectively.

Data are presented as mean ± SD, unless otherwise stated.

Values in parentheses represent percentages unless otherwise stated.
