# Supplementary material
Source: PubMed Central journal article supplement (PMC8453415)
Supplement: deaa232_supplementary_data_ts4.pdf [file deaa232_supplementary_data_ts4.pdf]

**Supplementary Table SIV** Reasons for refusal to participate in ancillary sub-studies.

**Adjusted odds ratios for predictive variables and participants for refusal to provide biological samples because too much blood to be drawn.**

| Variables                        | Too much blood to be drawn |         |
|----------------------------------|----------------------------|---------|
|                                  | OR (95% CI)                | P-value |
| Race                             |                            |         |
| White                            | 1                          |         |
| Black or African American        | 2.132 (1.161, 3.914)       | 0.015   |
| Asian                            | 2.332 (1.143, 4.757)       | 0.020   |
| American Indian or Alaska Native | 5.900 (1.111, 31.342)      | 0.037   |
| Ethnic group                     |                            |         |
| Not Hispanic or Latino           | 1                          | 0.014   |
| Hispanic or Latino               | 0.270 (0.095, 0.770)       |         |
| BMI                              | 0.936 (0.908, 0.965)       | <0.001  |

**Adjusted odds ratios for predictive variables and participants for refusal to provide biological samples because worried about the future use of biological specimens.**

| Variable | Worried about the future use of biological specimens* |         |
|----------|-------------------------------------------------------|---------|
|          | OR (95% CI)                                           | P-value |
| BMI      | 0.960 (0.924, 0.997)                                  | 0.033   |
